# Supplementary material for: Serum rheumatoid factor IgA, anti-citrullinated peptide antibodies with secretory components, and anti-carbamylated protein antibodies associate with interstitial lung disease in rheumatoid arthritis
Source: PubMed Central journal article supplement (PMC8756729; doi:10.1186/s12891-021-04985-0), 2022-01-13
Supplement: 12891_2021_4985_MOESM1_ESM.pdf [file 12891_2021_4985_MOESM1_ESM.pdf]

Supplementary Table S1. The positivity of RF, ACPA, and anti-CarP Ab in the RA patients.

|                             | ILD        |                        | UIP       |                       | NSIP      |                       | AD         |          | Emphysema |                       | CLD(+)     |                       | CLD(-)     |
|-----------------------------|------------|------------------------|-----------|-----------------------|-----------|-----------------------|------------|----------|-----------|-----------------------|------------|-----------------------|------------|
|                             |            | <i>P</i>               |           | <i>P</i>              |           | <i>P</i>              |            | <i>P</i> |           | <i>P</i>              |            | <i>P</i>              |            |
| RF positive, n (%)          | 104 (90.4) | 0.0467                 | 41 (89.1) | 0.2765                | 63 (91.3) | 0.0817                | 103 (92.0) | 0.0173   | 32 (86.5) | 0.6381                | 239 (90.5) | 0.0072                | 154 (81.5) |
| RF IgA positive, n (%)      | 80 (69.6)  | 1.96X10 <sup>-5</sup>  | 38 (82.6) | 2.47X10 <sup>-6</sup> | 42 (60.9) | 0.0242                | 62 (55.4)  | 0.0742   | 30 (81.1) | 5.02X10 <sup>-5</sup> | 172 (65.2) | 1.45X10 <sup>-5</sup> | 84 (44.4)  |
| ACPA IgG positive, n (%)    | 105 (91.3) | 0.8319                 | 43 (93.5) | 1.0000                | 62 (89.9) | 0.6162                | 102 (91.1) | 0.8299   | 34 (91.9) | 1.0000                | 241 (91.3) | 0.8641                | 174 (92.1) |
| ACPA IgA positive, n (%)    | 85 (73.9)  | 0.0247                 | 35 (76.1) | 0.0607                | 50 (72.5) | 0.1069                | 84 (75.0)  | 0.0164   | 28 (75.7) | 0.0962                | 197 (74.6) | 0.0020                | 115 (60.8) |
| ACPA SC positive, n (%)     | 75 (65.2)  | 0.0090                 | 31 (67.4) | 0.0335                | 44 (63.8) | 0.0494                | 64 (57.1)  | 0.2336   | 31 (83.8) | 0.0001                | 170 (64.4) | 0.0020                | 94 (49.7)  |
| Anti-CarPAb positive, n (%) | 63 (54.8)  | 8.70X10 <sup>-10</sup> | 29 (63.0) | 6.41X10 <sup>-8</sup> | 34 (49.3) | 8.43X10 <sup>-6</sup> | 20 (17.9)  | 0.6540   | 11 (29.7) | 0.1967                | 94 (35.6)  | 0.0004                | 38 (20.1)  |

ILD group includes UIP and NSIP groups. CLD(+) group includes UIP, NSIP, AD, and emphysema groups. Number of each group is shown. Percentages are shown in parenthesis. Difference was tested in the comparison with the CLD(-) population by Fisher's exact test using 2 × 2 contingency tables. ACPA, anti-citrullinated peptide antibody; AD, airway disease; CLD, chronic lung disease; CLD(+), with CLD; CLD(-), without CLD; ILD, interstitial lung disease; NSIP, nonspecific interstitial pneumonia; RA, rheumatoid arthritis; RF, rheumatoid factor; SC, secretory component UIP, usual interstitial pneumonia, CarP; carbamylated protein, Ab; antibody.
